# Supplementary material
Source: Research Square preprint supplement (doi:10.21203/rs.3.rs-9779187/v1)
Supplement: Supplementary file 2 [file fc72bd23352811177efbb586.docx]

**Supplementary File 2: Search string and inclusion criteria**

**MEDLINE (via PubMed interface)**

1. “adolescen*”[TIAB] OR “child*”[TIAB] OR “youth”[TIAB] OR “young people”[TIAB] OR “schoolchild”[TIAB] OR “teen*”[TIAB] OR “puberty”[TIAB] OR “Adolescent”[MeSH] OR “Child”[MeSH]

2. “co-creat*” [TIAB] OR “participatory research”[TIAB] OR “participatory action research”[TIAB] OR “PAR”[TIAB] OR “CBPR”[TIAB] OR “co-design”[TIAB] OR “co-produc*”[TIAB] OR “co-research*”[TIAB] OR “co-investigat*"[TIAB] OR “co-develop*”[TIAB] OR “stakeholder participation”[TIAB] OR “ community based participatory research” [TIAB] OR “citizen science” [TIAB] OR “community participation” [TIAB] OR “stakeholder participation"[MeSH] OR "community based participatory research"[MeSH] OR "Citizen Science"[MeSH] OR “Community Participation”[MeSH]

3. “physical activity”[TIAB] OR “sedentary behav*”[TIAB] OR “exercise”[TIAB] OR “movement”[TIAB] or “sleep”[TIAB] OR "exercise" [MeSH] OR “Sedentary Behavior”[MeSH] OR “Sleep”[MeSH]

**Scopus**

1. TITLE-ABS-KEY (“adolescen*” OR “child*” OR “youth” OR “young people” OR “schoolchild” OR “teen*” OR “puberty”)

2. TITLE-ABS-KEY (“co-creat*” OR “participatory research” OR “participatory action research” OR “PAR” OR “CBPR” OR “community-based participatory research” OR “co-design” OR “co-produc*” OR “stakeholder participation” OR “citizen science” OR “co-investigat*” OR “co-develop*”)

3. TITLE-ABS-KEY (“physical activity” OR “sedentary behav*” OR “exercise” OR “movement” OR “sleep”)

**Web of Science**

1. TS = (“adolescen*” OR “child*” OR “youth” OR “young people” OR “schoolchild” OR “teen*” OR “puberty”)

2. TS = (“co-creat*” OR “participatory research” OR “participatory action research” OR “PAR” OR “CBPR” OR “community-based participatory research” OR “co-design” OR “co-produc*” OR “stakeholder participation” OR “citizen science” OR “co-investigat*” OR “co-develop*”)

3. TS = (“physical activity” OR “sedentary behav*” OR “exercise” OR “movement” OR “sleep”)

**Embase**

1.'adolescen*':ti,ab,kw OR 'child*':ti,ab,kw OR 'youth':ti,ab,kw OR 'young people':ti,ab,kw OR 'schoolchild':ti,ab,kw OR 'teen*':ti,ab,kw OR 'puberty':ti,ab,kw OR 'adolescent'/exp OR 'child'/exp

2. 'co-creat*':ti,ab,kw OR 'participatory research':ti,ab,kw OR 'participatory action research':ti,ab,kw OR 'par':ti,ab,kw OR 'cbpr':ti,ab,kw OR 'co-design':ti,ab,kw OR 'co-produc*':ti,ab,kw OR 'co-research*':ti,ab,kw OR 'co-investigat*':ti,ab,kw OR 'co-develop*':ti,ab,kw OR 'stakeholder participation':ti,ab,kw OR 'community based participatory research':ti,ab,kw OR 'citizen science':ti,ab,kw OR 'community participation':ti,ab,kw OR 'stakeholder participation'/exp OR 'participatory research'/exp OR 'citizen science'/exp OR 'community participation'/exp

3. 'physical activity':ti,ab,kw OR 'sedentary behav*':ti,ab,kw OR 'exercise':ti,ab,kw OR 'movement':ti,ab,kw OR 'sleep':ti,ab,kw OR 'exercise'/exp OR 'sedentary lifestyle'/exp OR 'sleep'/exp

**Health CASCADE Co-Creation Database (Zotero interface)**

1. TITLE/ABSTRACT(adolescen*% OR child% OR youth% OR young people% OR schoolchild% OR teen*% OR puberty%)

2. TITLE/ABSTRACT(co-creat*% OR participatory research% OR participatory action research% OR PAR% OR CBPR% OR co-design% OR co-produc* OR co-research% OR co-investigat*% OR co-develop% OR stakeholder participation% OR community-based participatory research% OR citizen science%)

3. TITLE/ABSTRACT (physical activity% OR sedentary behav*% OR exercise% OR movement% OR sleep%)

**Inclusion Criteria:**

- Studies in English
- A main focus of the intervention should be at least one of physical activity, sedentary behavior, or sleep behavior
- Articles published since 2012
- Majority of participants aged 6-18
- Studies use at least one theory/theoretical framework to develop the intervention, such as behavior change theories
- Empirical or protocol paper
- Publication applied co-creation according to the definition of Vargas et al. (2022)

**Exclusion Criteria**

- Studies not published in English
- Editorials
- Letters to Editor
- Short communications
- Review papers
- Articles older than 2012
- Studies that do not include the description of an intervention
- Studies that do not use at least one theory about the content of the intervention
- Publication does not adhere to co-creation as defined by Vargas et al. (2022)
